# Supplementary material for: A reappraisal of CTLA-4 checkpoint blockade in cancer immunotherapy
Source: PubMed Central journal article supplement (PMC5939050; doi:10.1038/s41422-018-0011-0), 2018-02-22
Supplement: 41422_2018_11_MOESM1_ESM.pdf [file 41422_2018_11_MOESM1_ESM.pdf]

## Supplementary information, Table S1

Binding characteristics of humanized L3D10 clones used in this study.

| Antibodies | Antigen | KD (M)  | K <sub>on</sub> (1/Ms) | K <sub>dis</sub> (1/s) |
|------------|---------|---------|------------------------|------------------------|
| HL12       | CTLA4Fc | 7.2E-09 | 2.3E+05                | 1.6E-03                |
| HL32       | CTLA4Fc | 7.1E-09 | 2.7E+05                | 1.9E-03                |
| L3D10      | CTLA4Fc | 2.3E-09 | 3.5E+05                | 8.0E-04                |

Multi-concentration kinetic experiments were performed on the Octet Red96 system (ForteBio). Anti-hIgG-Fc biosensors (ForteBio, #18-5064) were hydrated in sample diluent (0.1% BSA in PBS and 0.02% Tween 20) and preconditioned in pH 1.7 Glycine.

The antigen was diluted using a 7-point, 2-fold serial dilution starting at 600 nM with sample diluent. All antibodies were diluted to 10 µg/ml with sample diluent and then immobilized onto anti-hIgG-Fc biosensors for 120 seconds. After baselines were established for 60 seconds in sample diluent, the biosensors were moved to wells containing the antigen at a series of concentrations to measure the association.

Association was observed for 120 seconds and dissociation was observed for 180 seconds for each protein of interest in the sample diluent. K<sub>on</sub>, on rate; K<sub>dis</sub>, off rate; KD, the equilibrium dissociation constant.
