# Supplementary material for: A reappraisal of CTLA-4 checkpoint blockade in cancer immunotherapy
Source: PubMed Central journal article supplement (PMC5939050; doi:10.1038/s41422-018-0011-0), 2018-02-22
Supplement: 41422_2018_11_MOESM5_ESM.pdf [file 41422_2018_11_MOESM5_ESM.pdf]

Figure S4

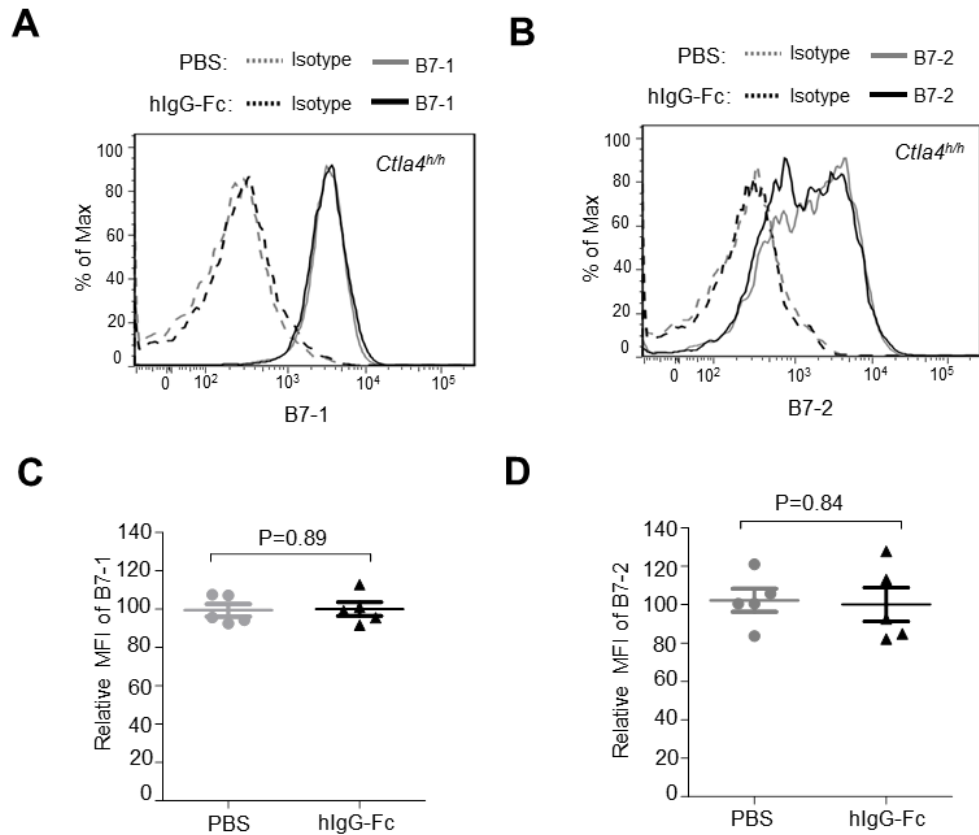

**Supplementary information, Figure S4** Despite somewhat higher levels of endotoxin detected in the hlgG-Fc preparation than the antibody preparations, hlgG-Fc did not up-regulate B7-1 and B7-2 expressions on mouse spleen DCs. **(A, B)** Representative profiles of B7-1 **(A)** and B7-2 **(B)** expression among the spleen DCs gated as depicted in Figure 5B from *Ctla4<sup>h/h</sup>* mice treated with 500 $\mu$ g of hlgG-Fc or equal volume of PBS. **(C, D)** Summarization of mean fluorescence intensities for B7-1 **(C)** and B7-2 **(D)** expressed on spleen DCs. n=5 *Ctla4<sup>h/h</sup>* mice for each group. Therefore, the profiles of the control hlgG-Fc-treated mice reflect the basal expression levels of B7-1 and B7-2. Thus, the lack of effect of Ipilimumab over hlgG-Fc indicates its inability to up-regulate B7-1 and B7-2 *in vivo*.
