# Supplementary material for: A reappraisal of CTLA-4 checkpoint blockade in cancer immunotherapy
Source: PubMed Central journal article supplement (PMC5939050; doi:10.1038/s41422-018-0011-0), 2018-02-22
Supplement: 41422_2018_11_MOESM6_ESM.pdf [file 41422_2018_11_MOESM6_ESM.pdf]

Figure S5

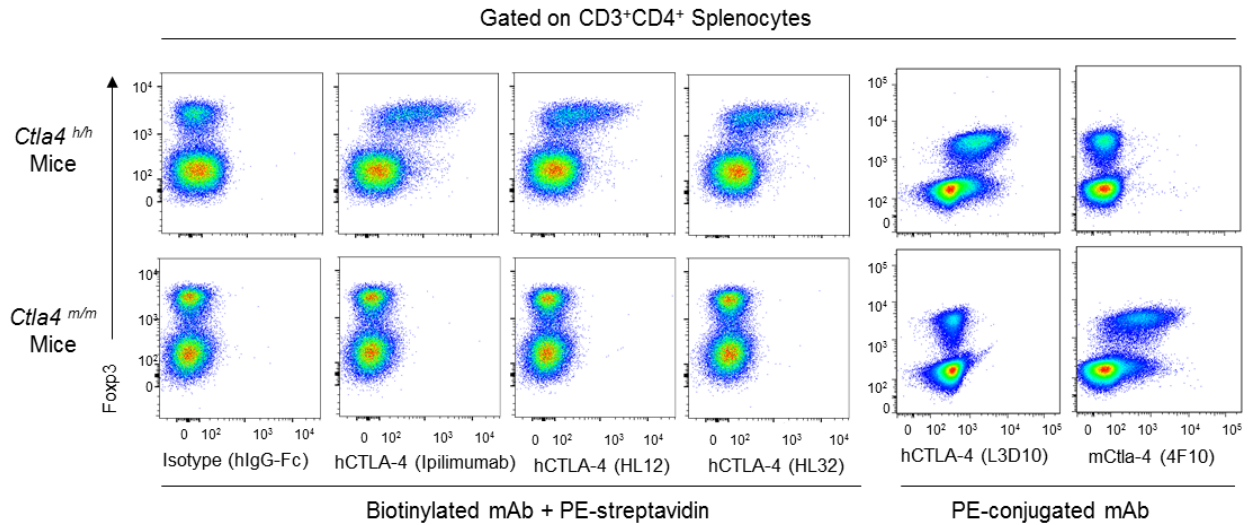

**Supplementary information, Figure S5** L3D10, HL12, HL32 and Ipilimumab bind to human CTLA-4 but not mouse C*tla*-4. Data shown are dot plots of intracellular staining of CTLA-4 among gated CD3<sup>+</sup>CD4<sup>+</sup> cells, using spleen cells from *Ctla4*<sup>hh/hh</sup> (top) or *Ctla4*<sup>m/m</sup> (bottom) mice. Anti-mouse C*tla*-4 mAb 4F10 (BD Biosciences) was used as control. Anti-CD3 (clone 145-2C11), CD4 (clone RM4-5), Foxp3 (clone FJK-16s) mAbs and Foxp3 staining buffer were purchased from eBioscience.
