# Supplementary material for: A reappraisal of CTLA-4 checkpoint blockade in cancer immunotherapy
Source: PubMed Central journal article supplement (PMC5939050; doi:10.1038/s41422-018-0011-0), 2018-02-22
Supplement: 41422_2018_11_MOESM7_ESM.pdf [file 41422_2018_11_MOESM7_ESM.pdf]

Figure S6

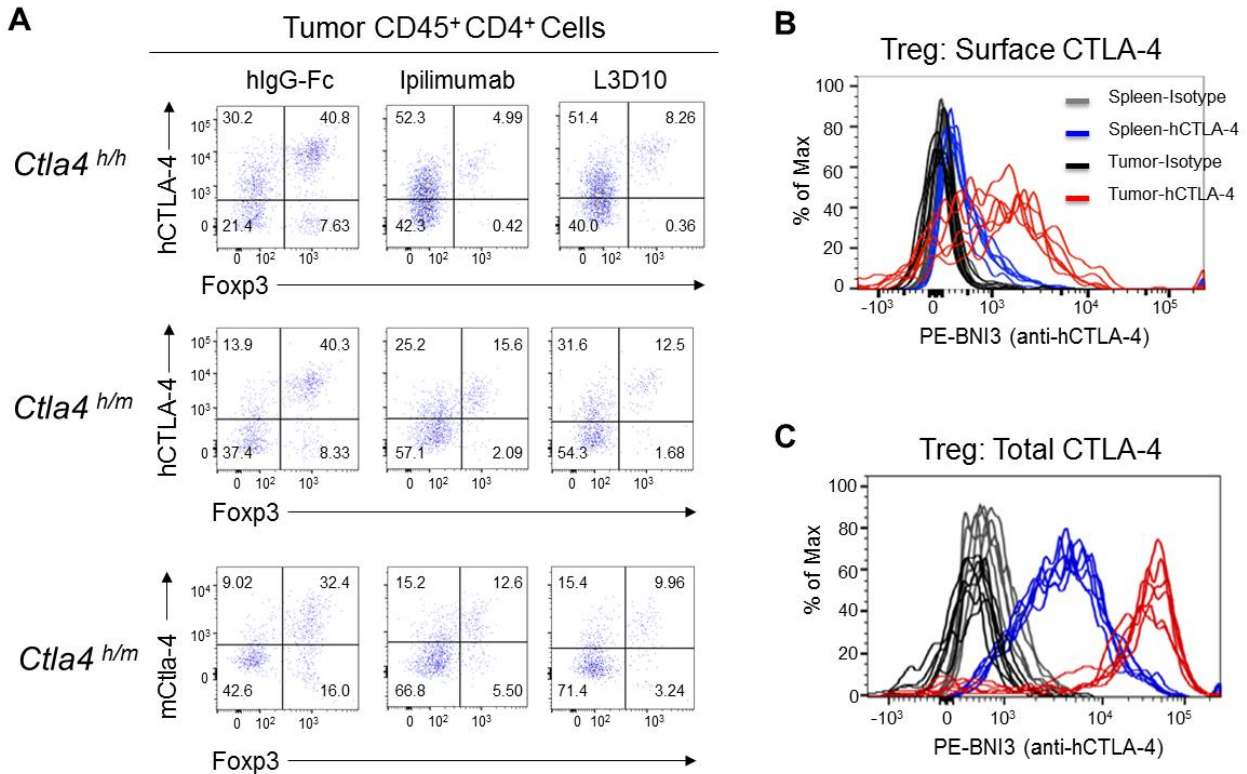

**Supplementary information, Figure S6** CTLA-4 was preferentially highly expressed in tumor-infiltrated Tregs. **(A)** Tumor-derived Tregs had higher expression of CTLA-4 than Foxp3-negative CD4 T cells. As in Figure 7, MC38 tumor cells were injected into *Ctla4*<sup>h/h</sup> or *Ctla4*<sup>h/m</sup> mice and mice were treated with 100µg control hlgG-Fc or anti-CTLA-4 mAbs. Five days after the third antibody treatment, mice were sacrificed and tumor cells were subjected to flow cytometric analysis on human CTLA-4 or mouse Ctla-4 expression in tumor-infiltrated CD45<sup>+</sup>CD4<sup>+</sup>Foxp3<sup>+</sup> Tregs and CD45<sup>+</sup>CD4<sup>+</sup>Foxp3<sup>-</sup> T cells. Data represent the results from one of three independent experiments. **(B, C)** Tregs from tumor had higher expression of both surface CTLA-4 and total CTLA-4 than that from spleen. As in Figure 7, 14 days after MC38 tumor inoculation, *Ctla4*<sup>h/h</sup> mice were sacrificed for flow cytometric analysis on surface CTLA-4 **(B)** and total CTLA-4 **(C)** expression in spleen and tumor derived CD4<sup>+</sup>Foxp3<sup>+</sup> Tregs. Each line of the histogram

plots indicates one individual mouse.  $n=6$  mice and data shown represent the results from one of at least three independent experiments.
