# Supplementary material for: A reappraisal of CTLA-4 checkpoint blockade in cancer immunotherapy
Source: PubMed Central journal article supplement (PMC5939050; doi:10.1038/s41422-018-0011-0), 2018-02-22
Supplement: 41422_2018_11_MOESM8_ESM.pdf [file 41422_2018_11_MOESM8_ESM.pdf]

Figure S7

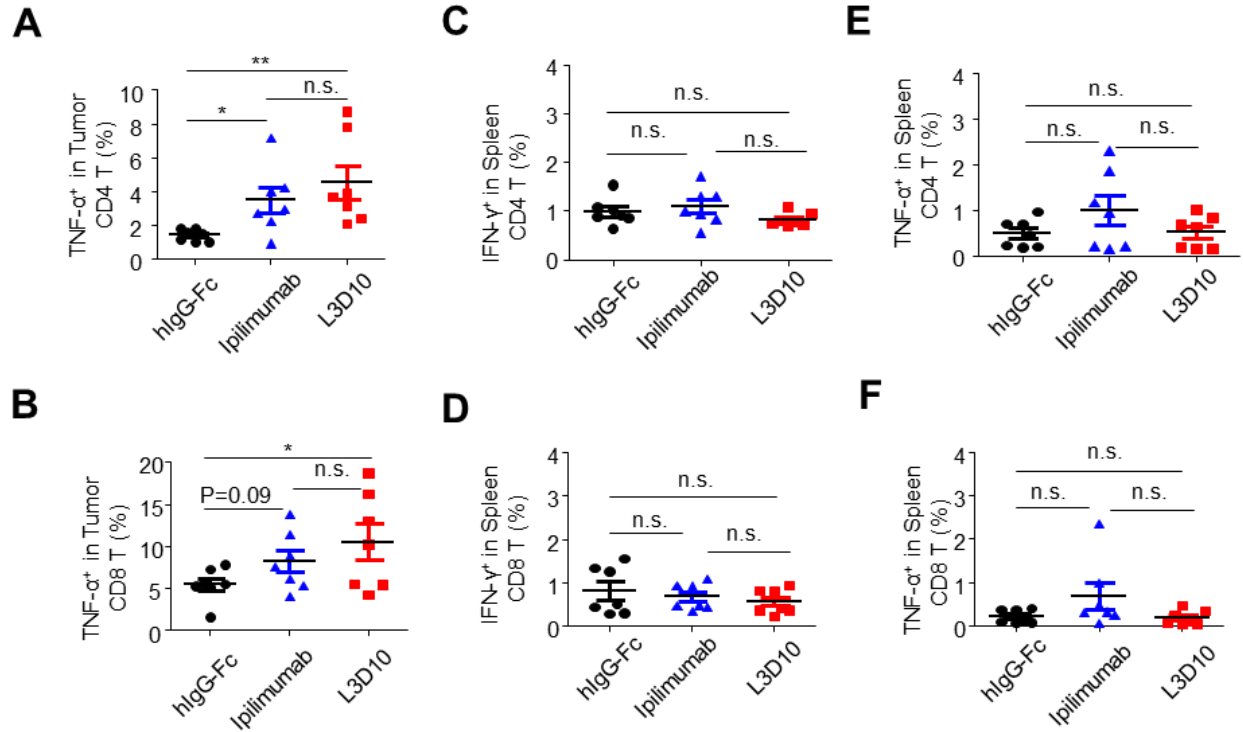

**Supplementary information, Figure S7** Effects of anti-hCTLA-4 mAbs on IFN $\gamma$  and TNF $\alpha$  production among spleen and tumor T cells. As in Figure 7A, MC38 tumor cells were injected into *Ctla4<sup>h/h</sup>* mice and mice were treated with 100 $\mu$ g control hlgG-Fc or anti-CTLA-4 mAbs. Three days after the third antibody treatment, mice were sacrificed to analyze the frequencies of IFN $\gamma$ <sup>+</sup> and TNF $\alpha$ <sup>+</sup>-expressing cells among CD4 (A, C, E) and CD8 (B, D, F) T cells in tumors (A, B) and spleens (C-F) from the treated mice. Summary data are from two experiments involving 7 mice per group.
