# Supplementary material for: A reappraisal of CTLA-4 checkpoint blockade in cancer immunotherapy
Source: PubMed Central journal article supplement (PMC5939050; doi:10.1038/s41422-018-0011-0), 2018-02-22
Supplement: 41422_2018_11_MOESM9_ESM.pdf [file 41422_2018_11_MOESM9_ESM.pdf]

Figure S8

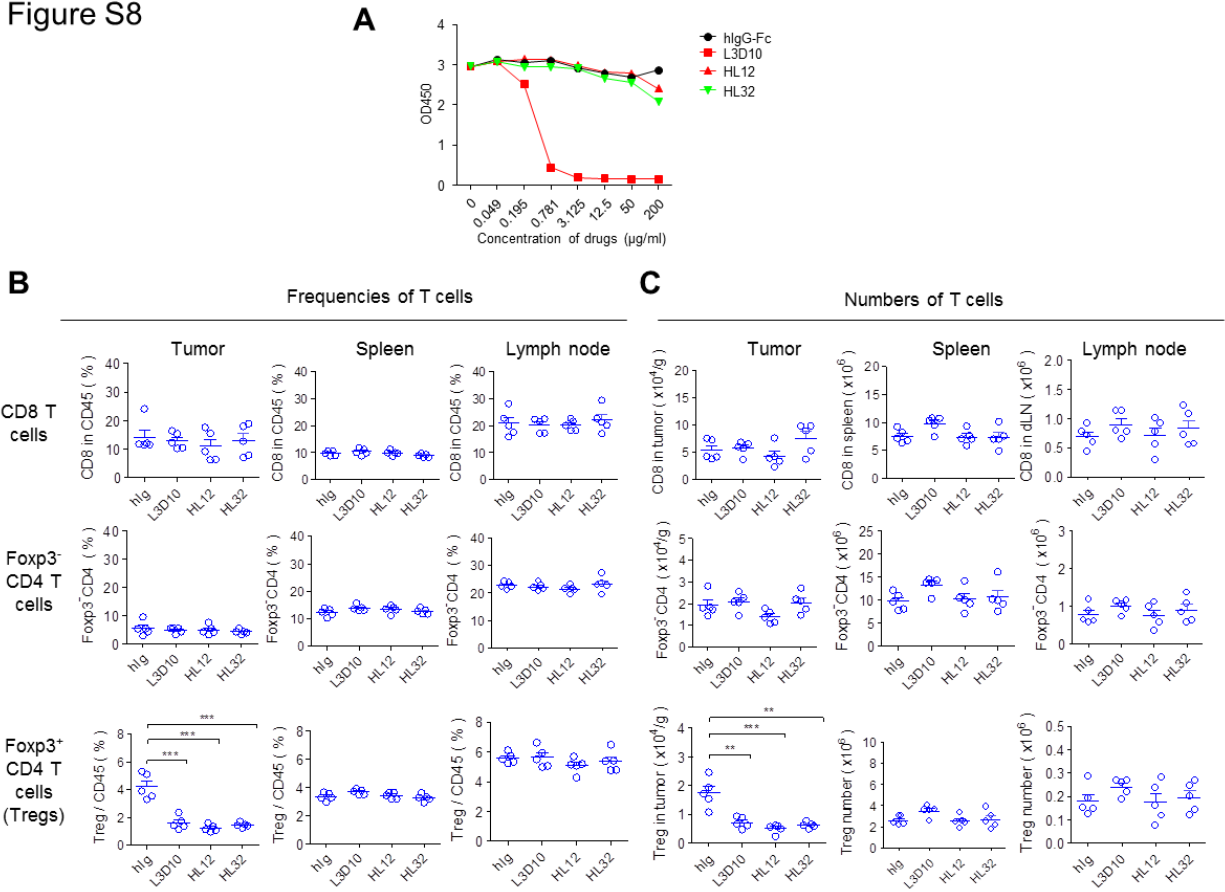

**Supplementary information, Figure S8** Despite the inability to block CTLA-4-B7

interaction, HL12 and HL32 exhibit similar effects as L3D10 on abundance of T cell subpopulations in peripheral lymph organs and tumors. **(A)** The ability of HL12 and HL32 to block soluble B7 binding to immobilized CTLA-4-Fc was abrogated. hCTLA-4-Ig was immobilized at the concentration of 0.25µg/ml on 96-well ELISA plate. Biotinylated hB7-1-Fc was added at 0.25µg/ml along with giving doses of anti-CTLA-4 mAbs (L3D10, HL12 and HL32) or control hlgG-Fc. After washing, the plate-bound biotinylated hB7-1-Fc was detected with HRP-conjugated avidin. Data shown are means of triplicate optical density at 450 nm. Results are representative of 3 independent experiments. **(B, C)** L3D10, HL12 and HL32 preferentially eliminate tumor-infiltrated Tregs. As in Figures 8E-8G, the frequencies **(B)** and numbers **(C)** of CD8 T cells (top row), CD4<sup>+</sup>Foxp3<sup>-</sup> T

cells (middle row) and CD4<sup>+</sup>Foxp3<sup>+</sup> Tregs (bottom row) in tumor, spleen and tumor draining lymph node (dLN) were analyzed. Live CD45<sup>+</sup> leukocytes were initially gated to quantitate the frequencies of T cell subpopulations (T subset/CD45<sup>+</sup> cells X 100%) in various tissues, and the numbers of T cell subpopulations in tumors were normalized against tumor weight (gram). Mice were sacrificed one day after one injection of 100μg indicated drug. Data shown were pooled from 2 experiments. n=5 mice for each group.
