# Supplementary material for: A reappraisal of CTLA-4 checkpoint blockade in cancer immunotherapy
Source: PubMed Central journal article supplement (PMC5939050; doi:10.1038/s41422-018-0011-0), 2018-02-22
Supplement: 41422_2018_11_MOESM10_ESM.pdf [file 41422_2018_11_MOESM10_ESM.pdf]

Figure S9

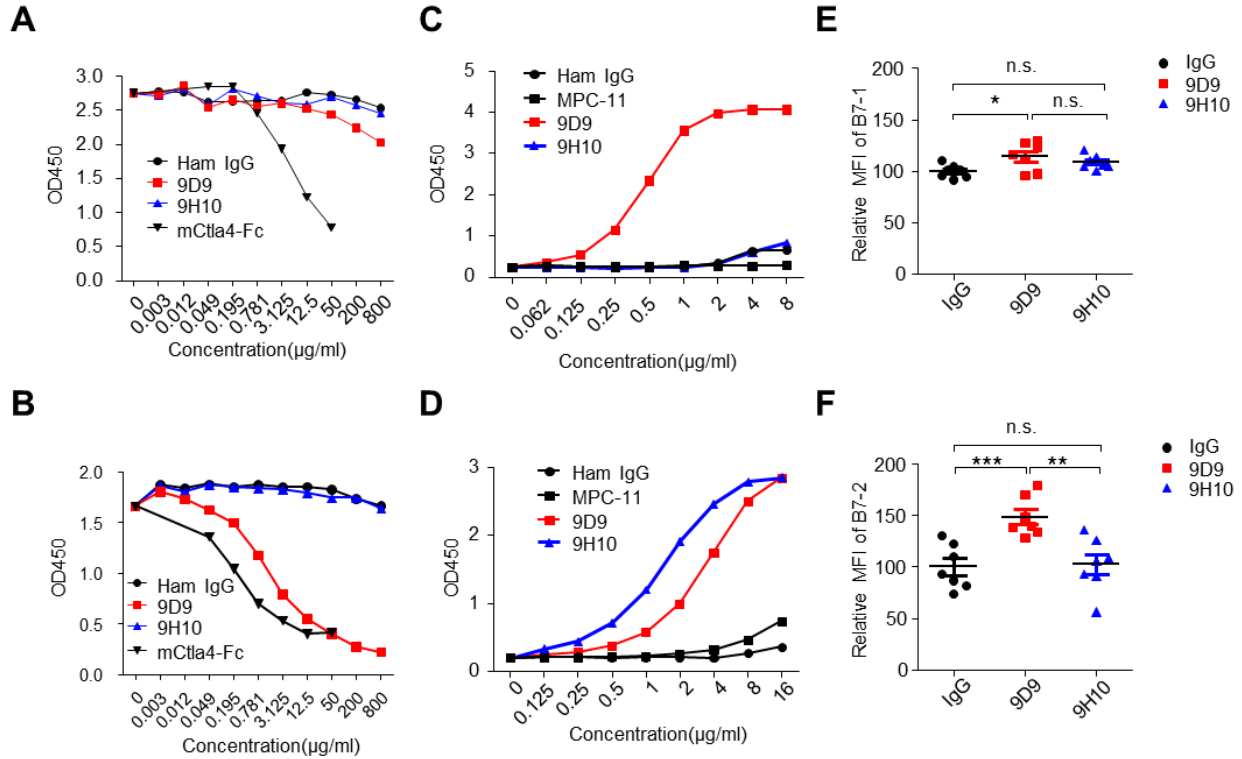

**Supplementary information, Figure S9** Evaluation of blocking activities of commonly used anti-mouse Ctla-4 mAbs 9H10 and 9D9. **(A, B)** 9H10 does not block B7-CTLA-4 interaction if B7-1 **(A)** and B7-2 **(B)** are coated onto plates. Biotinylated mouse Ctla-4-Fc fusion protein were incubated with B7-coated plates in the presence of given concentration of control IgG or anti-mouse Ctla-4 mAb 9D9 and 9H10. Data shown are means of duplicated wells and are representative of two independent experiments. **(C, D)** 9D9 and 9H10 exhibit differential binding ability to soluble **(C)** and plate bound Ctla-4-Fc **(D)**. MPC-11(mouse IgG2b) and Hamster IgG (Ham IgG) are isotype-matched control Ig proteins. Data shown are means of duplicated wells and are representative of at least two independent experiments. **(E, F)** Differential effect of anti-mouse Ctla-4 mAbs 9D9 and 9H10 on upregulating the levels of B7-1 **(E)** and B7-2 **(F)** on splenic CD11c<sup>high</sup> DCs from WT (*Ctla4<sup>m/m</sup>*) mice. At 24 hours after treatment with 500 µg

antibodies, mice were sacrificed and splenocytes were harvested for flow staining immediately. IgG group indicates mice receiving 500  $\mu$ g of MPC-11 and 500 $\mu$ g of Ham IgG. The data (Mean  $\pm$  S.E.M.) are summarized from 6 independent mice per group in two independent experiments involving 3 mice per group each. Statistical significance in e and f was determined using Student's *t* test. \* $P$ <0.05, \*\* $P$ <0.01, \*\*\* $P$ <0.001. n.s., not significant.
